# Supplementary material for: A solar desalination charger for water treatment and value-added chemical production
Source: Royal Society of Chemistry journal article supplement (doi:10.1039/d4ee00782d), 2024-01-01
Supplement: d4ee00782d1.pdf [file d4ee00782d1.pdf]

*Supplementary Materials*

Solar desalination charger for water treatment and value-added chemical  
production

Seonghun Kim,<sup>1</sup> Dong Suk Han,<sup>2</sup> and Hyunwoong Park<sup>1,\*</sup>

<sup>1</sup>*School of Energy Engineering, Kyungpook National University, Daegu 41566, Korea*

<sup>2</sup>*Center for Advanced Materials, Qatar University, Doha 2713, Qatar*

\* To whom correspondence should be addressed (H. Park)

E-mail: [hwp@knu.ac.kr](mailto:hwp@knu.ac.kr); Tel: +82-53-950-8973

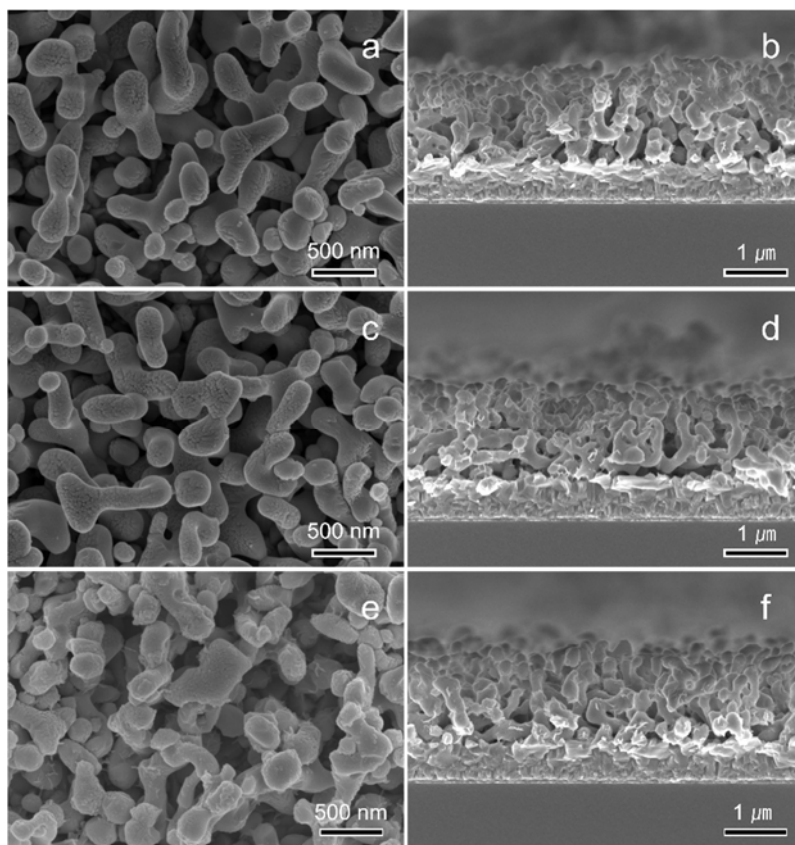

**Fig. S1.** FE-SEM images of (a and b) BVO, (c and d) WBVO, and (e and f) Co-WBVO.

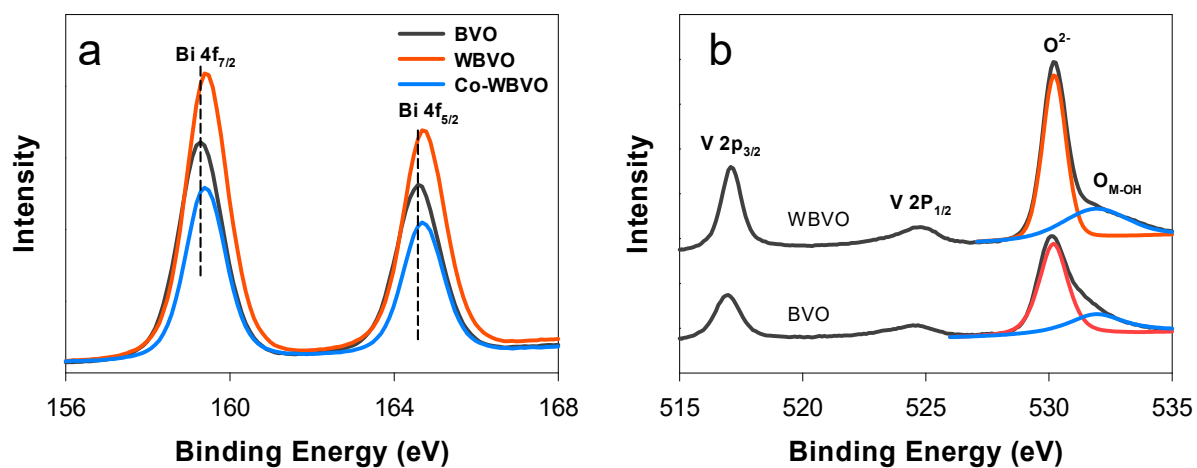

Fig. S2. XPS spectra of Bi 4f, V 2p, and O 1s bands for BVO and WBVO samples.

**Table S1.** Photoelectrocatalytic chloride oxidation activities using various photoanodes

| Sample                                         | Potential (V)         | $J_{ph}$ (mA cm <sup>-2</sup> ) | Electrolyte         | Light source (mW cm <sup>-2</sup> )           | FE <sub>ClOR</sub> (%) | Ref.      |
|------------------------------------------------|-----------------------|---------------------------------|---------------------|-----------------------------------------------|------------------------|-----------|
| BiVO <sub>4</sub> /WO <sub>3</sub>             | 1.4 V                 | 1.25                            | 5 M NaCl            | 100 mW cm <sup>-2</sup><br>L-42 cutoff filter | 81.4                   | [1]       |
| BiVO <sub>4</sub> /WO <sub>3</sub>             | 1.42 V <sub>RHE</sub> | 2.61                            | 4 M NaCl,<br>pH 1   | 100 mW cm <sup>-2</sup>                       | 74                     | [2]       |
| WO <sub>3</sub>                                | 1.46 V <sub>RHE</sub> | 4.78                            | Synthetic seawater  | 100 mW cm <sup>-2</sup>                       | 70                     | [3]       |
| Co doped BiVO <sub>4</sub>                     | 1.1 V <sub>RHE</sub>  | 0.19                            | 1 M NaCl,<br>pH 2.3 | 100 mW cm <sup>-2</sup>                       | 92                     | [4]       |
| CoOx-loaded BiVO <sub>4</sub> /WO <sub>3</sub> | 1.0 V <sub>RHE</sub>  | 1                               | 0.5 M NaCl          | 100 mW cm <sup>-2</sup><br>L-42 cutoff filter | 95                     | [5]       |
| BiVO <sub>4</sub>                              |                       | 1.45                            |                     |                                               | 40                     | This work |
| W-BiVO <sub>4</sub>                            | 1.36 V <sub>RHE</sub> | 2.4                             | 0.171 M NaCl        | 100 mW cm <sup>-2</sup>                       | 48                     | This work |
| W-BiVO <sub>4</sub> / CoOOH                    |                       | 3.55                            |                     |                                               | 91                     | This work |

## References

1. Iguchi, S., Y. Miseki, and K. Sayama, *Efficient hypochlorous acid (HClO) production via photoelectrochemical solar energy conversion using a BiVO<sub>4</sub>-based photoanode*. Sustainable Energy & Fuels, 2018. **2**(1): p. 155-162.
2. Rassoolkhani, A.M., et al., *Nanostructured bismuth vanadate/tungsten oxide photoanode for chlorine production with hydrogen generation at the dark cathode*. Communications Chemistry, 2019. **2**(1): p. 57.
3. Jadwiszczak, M., et al., *Highly efficient sunlight-driven seawater splitting in a photoelectrochemical cell with chlorine evolved at nanostructured WO<sub>3</sub> photoanode and hydrogen stored as hydride within metallic cathode*. Advanced Energy Materials, 2020. **10**(3): p. 1903213.
4. Chauhan, I., et al., *Nanostructured Co-doped BiVO<sub>4</sub> for efficient and sustainable photoelectrochemical chlorine evolution from simulated sea-water*. Dalton Trans, 2023.
5. Okunaka, S., Y. Miseki, and K. Sayama, *Improvement of photoelectrochemical HClO production under visible light irradiation by loading cobalt oxide onto a BiVO<sub>4</sub> photoanode*. Catalysis Science & Technology, 2021. **11**(16): p. 5467-5471.

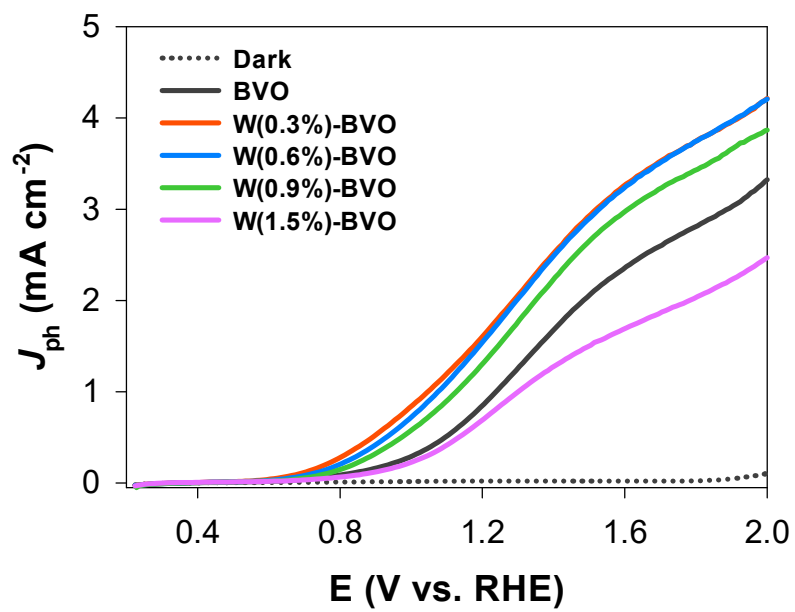

**Fig. S3.** Linear sweep voltammograms with BVO and W-doped BVO in 0.171 M NaCl solution in the dark and under 1 sun.

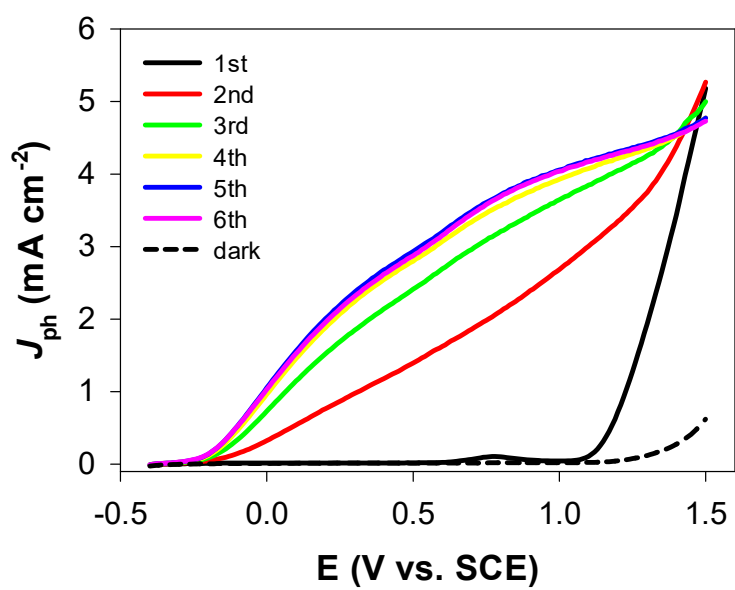

**Fig. S4.** Repetitive linear sweep voltammograms with Co-WBVO in 0.171 M NaCl in the dark and under 1 sun.

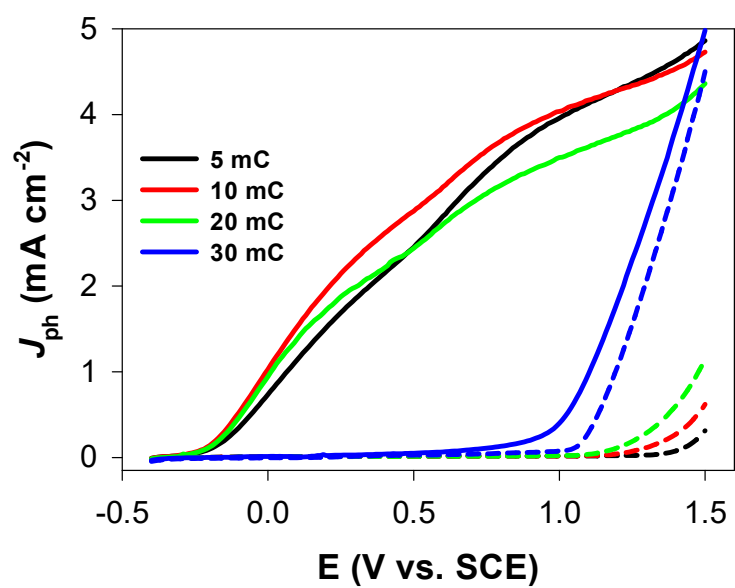

**Fig. S5.** Linear sweep voltammograms with Co-WBVO as a function of Co-electrodeposition charges on WBVO in 0.171 M NaCl solution in the dark (dashed curves) and under 1 sun (solid curves).

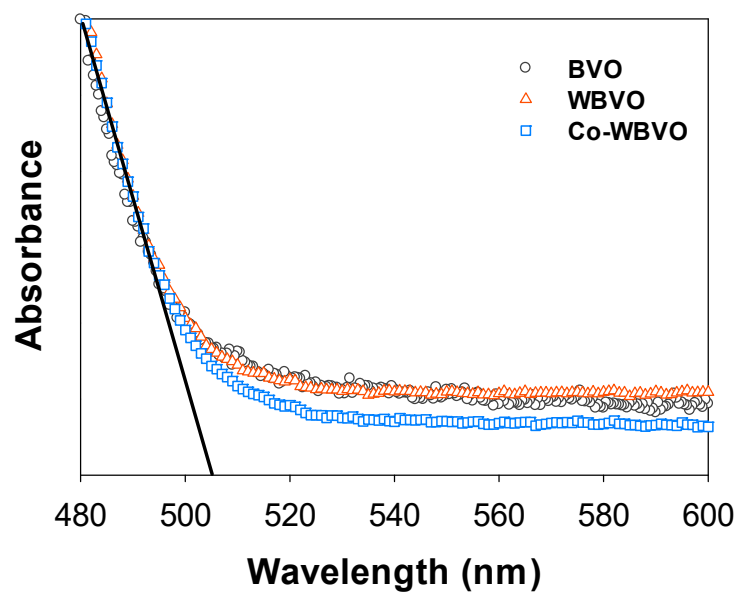

**Fig. S6.** UV-Vis diffuse reflectance absorption spectra of BVO, WBVO, Co-WBVO films.



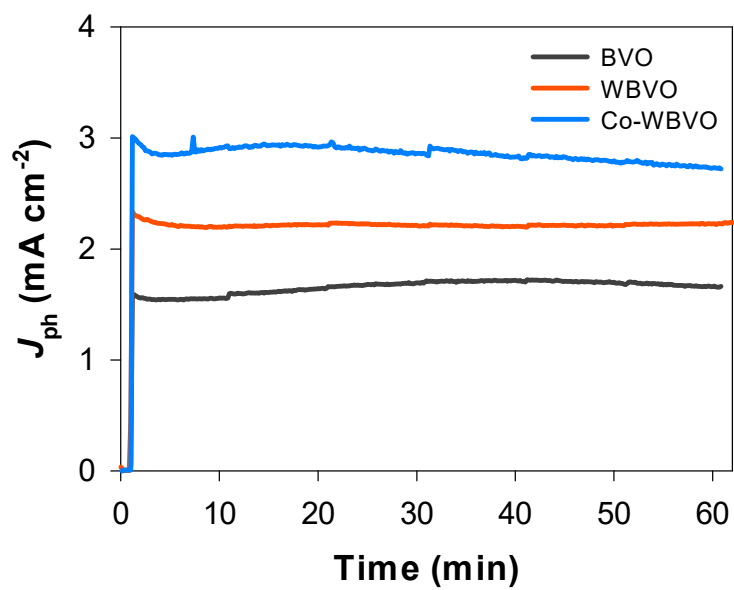

**Fig. S7.** Time-profiled  $J_{\text{ph}}$  changes at  $E = 1.36 \text{ V}_{\text{RHE}}$  ( $0.73 \text{ V}_{\text{SCE}}$ ) in  $0.171 \text{ M NaCl}$  under AM 1.5 ( $100 \text{ mW cm}^{-2}$ ).

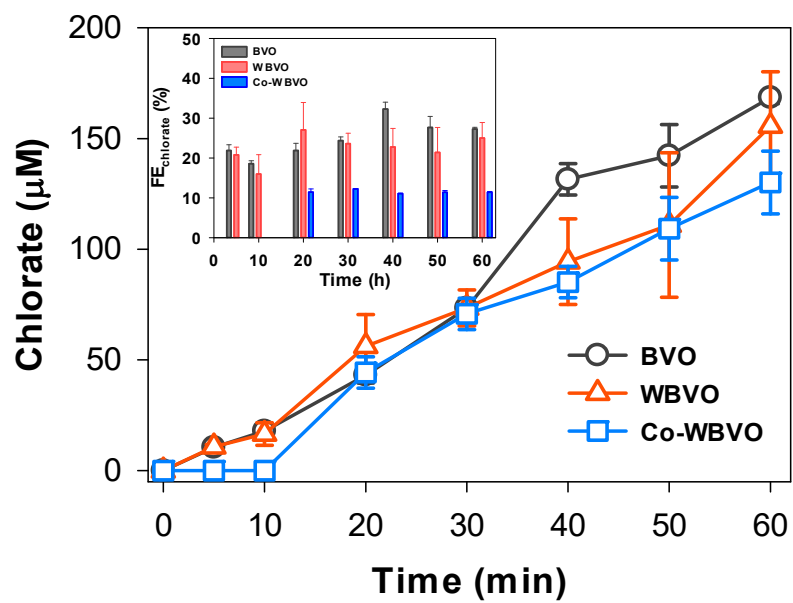

**Fig. S8.** Chlorate production during photoelectrochemical chloride oxidation using bare and modified BVO electrodes at  $E = 1.36$  V vs. RHE in 0.171 M NaCl under 1 sun.

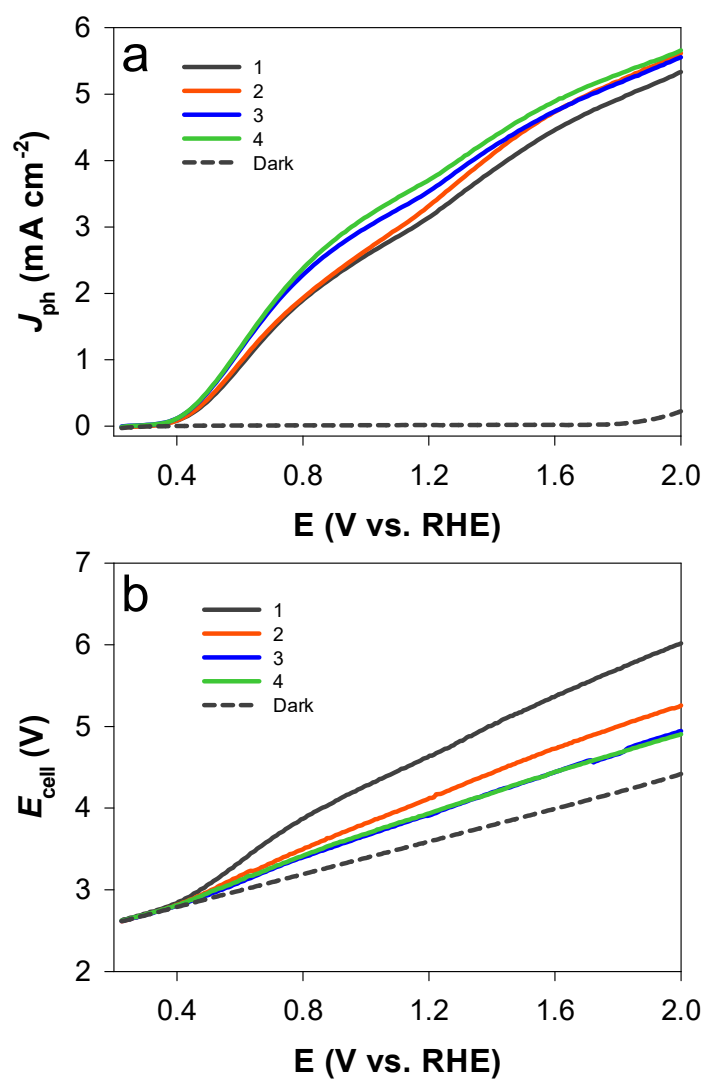

**Fig. S9.** (a) Linear sweep voltammograms with Co-WBVO photoanode coupled with different number of Na<sub>x</sub>C electrode and (b) concurrent changes in  $E_{cell}$  of the Co-WBVO and Na<sub>x</sub>C array pairs as a function of number of Na<sub>x</sub>C electrode in 0.171 M NaCl under 1 sun. Na<sub>x</sub>C electrodes were connected in parallel.

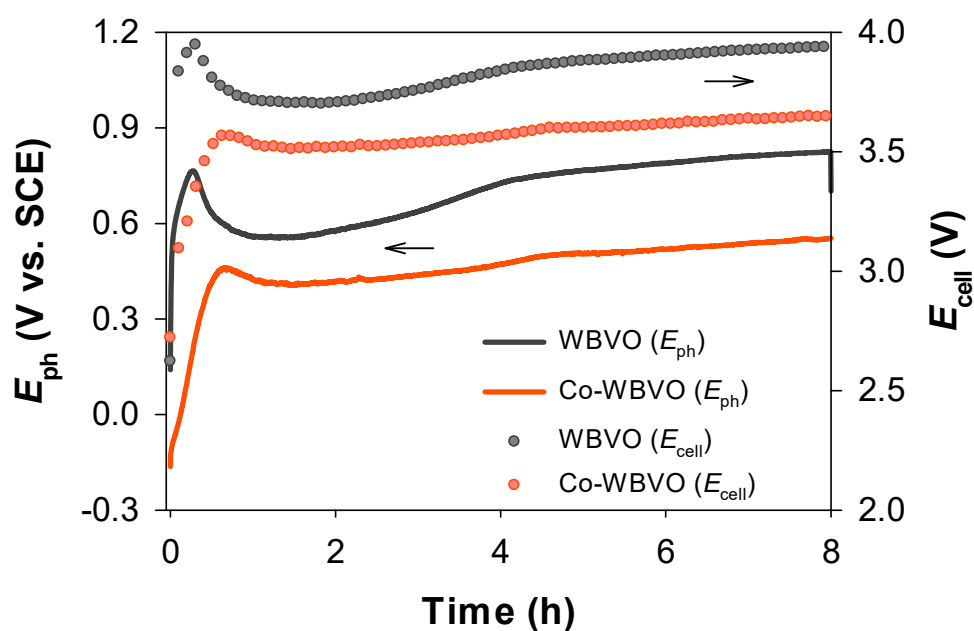

**Fig. S10.** Changes in the photopotential ( $E_{ph}$ ) of WBVO and Co-WBVO photoelectrode coupled to  $\text{Na}_x\text{C}$  electrode in 0.171 M NaCl containing As(III) (1 mM) and  $\text{NH}_3$  (1 mM) under 1 sun. While  $J_{ph}$  of  $1 \text{ mA cm}^{-2}$  was constantly maintained to the photoelectrodes,  $E_{cell}$ s of the photoelectrode and  $\text{Na}_x\text{C}$  electrode pairs were recorded. Note that the solution pH changed with time and hence the SCE scale was used.

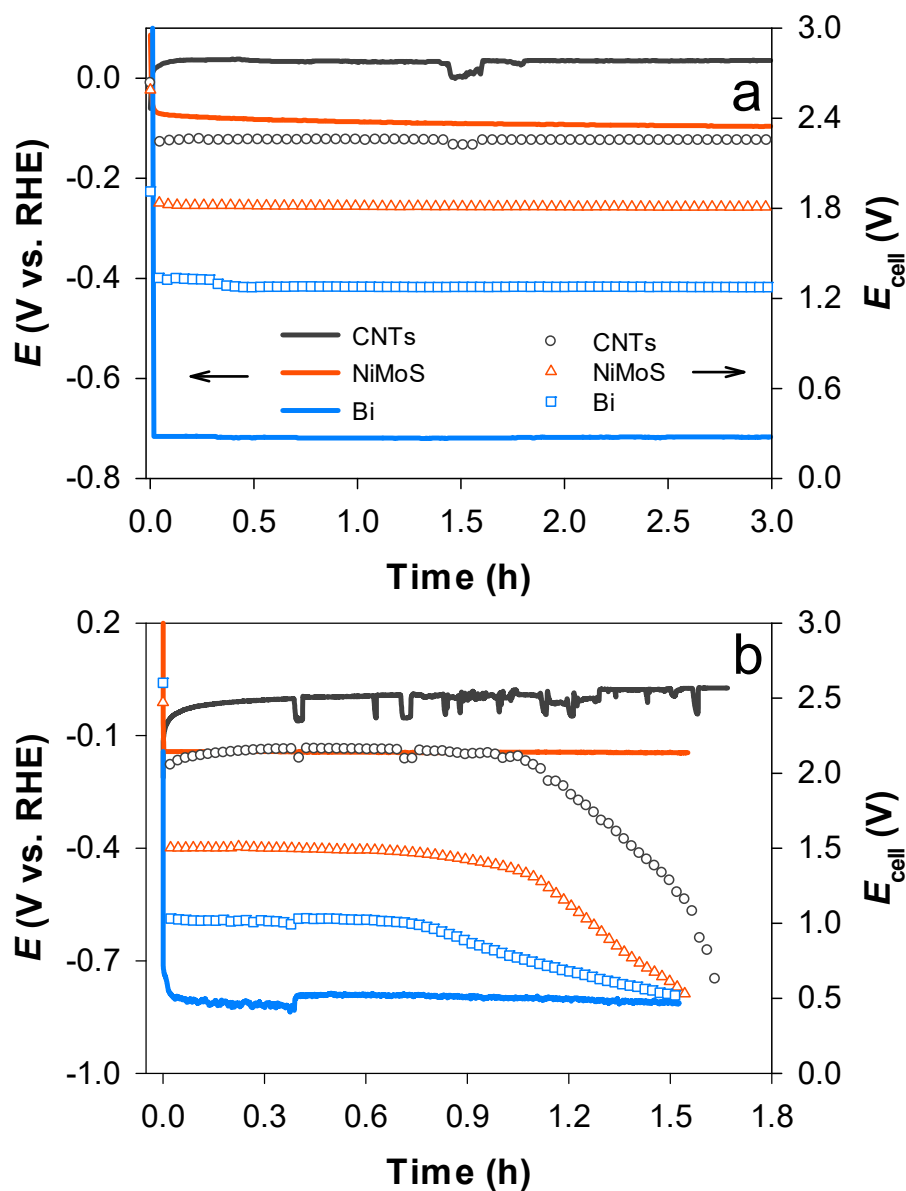

**Fig. S11.** Changes in discharging potentials (V vs. RHE) of CNTs, NiMoS, and Bi connected to the charged  $\text{Na}_x\text{C}$  with 8 mAh in 0.1 M  $\text{K}_2\text{SO}_4$  (pH 6.5) purged with  $\text{O}_2$ , 0.1 M  $\text{KOH}$  (pH 13) purged with  $\text{N}_2$ , and 0.1 M  $\text{KHCO}_3$  (pH 6.8) purged with  $\text{CO}_2$ , respectively. Constant  $J$  values of (a)  $-1 \text{ mA cm}^{-2}$  and (b)  $-3 \text{ mA cm}^{-2}$  were applied to the electrocatalysts, while  $E_{\text{cell}}$ s of the electrocatalyst and  $\text{Na}_x\text{C}$  pairs were recorded.

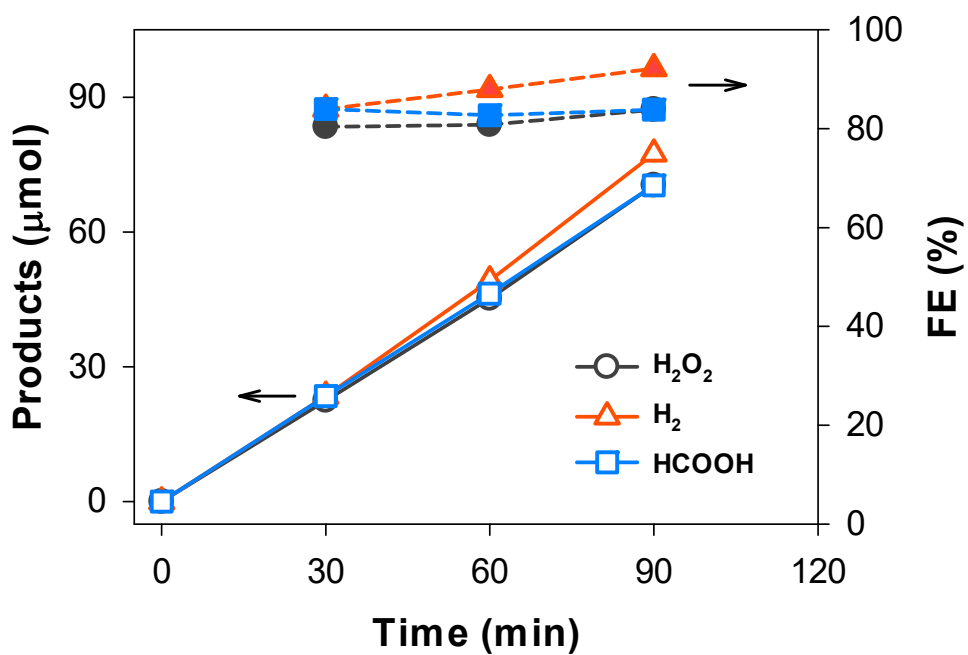

**Fig. S12.** Simultaneous productions and FEs of  $\text{H}_2\text{O}_2$  via  $\text{O}_2$  reduction with CNTs,  $\text{H}_2$  via water reduction with NiMoS, and  $\text{HCOOH}$  via  $\text{CO}_2$  reduction with Bi during the discharging stages.  $J = -3 \text{ mA cm}^{-2}$ . See Fig. S11 for experimental conditions.

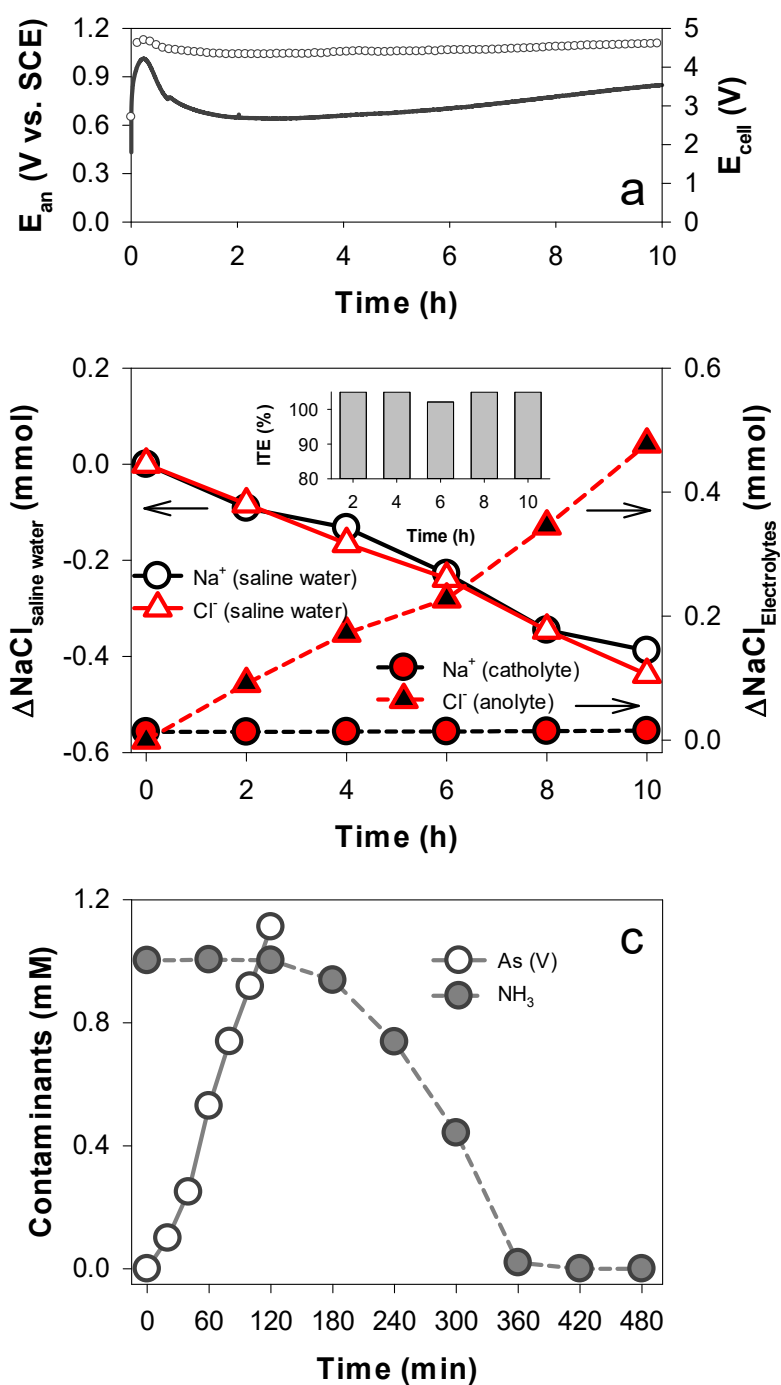

**Fig. S13.** A solar charging process with desalination of saline water (0.171 M NaCl) and oxidation of water contaminants (mixed As(III) and NH<sub>3</sub>, each 1 mM). A WBVO photoelectrode (with SCE electrode) and Na<sub>x</sub>C electrode were immersed in 0.171 M NaCl solutions. See **Scheme 1b** for the experimental setup. (a) Changes in  $E_{ph}$  of WBVO, and  $E_{cell}$  of WBVO and Na<sub>x</sub>C pair at  $J_{ph}$  of 1 mA cm<sup>-2</sup>. (b) Changes in the amounts of Na<sup>+</sup> and Cl<sup>-</sup> in the saline water, Na<sup>+</sup> in the catholyte, and Cl<sup>-</sup> in the anolyte. Inset shows ITEs. (c) Changes in As(V) and NH<sub>3</sub> concentrations.
